# Supplementary material
Source: publisher figshare collection journal article supplement (https://asha.figshare.com/articles/dataset/_/6170171)
Supplement: Supplementary file 1 [file 1]

## Appendix A. Databases and key words searched

### Electronic Databases:

Centre for Reviews and Dissemination ([www.york.ac.uk/inst/crd/](http://www.york.ac.uk/inst/crd/))  
CINAHL (EBSCO)  
Cochrane Library (Wiley)  
ComDisDome (CSA)  
Communication & Mass Media Complete (EBSCO)  
CSA Neurosciences Abstracts  
CSA Social Services Abstracts  
EBM Guidelines (Wiley)  
Education Research Complete (EBSCO)  
ERIC (CSA)  
GoogleScholar (<http://scholar.google.com/>)  
Health Information Resources formerly National Library for Health  
([www.library.nhs.uk/Default.aspx](http://www.library.nhs.uk/Default.aspx))  
Health Source: Nursing/Academic Edition (EBSCO)  
HighWire Press  
ISI Web of Knowledge  
Latin American and Caribbean Center on Health Sciences Information (LILACS)  
([www.bireme.br/php/index.php?lang=en](http://www.bireme.br/php/index.php?lang=en))  
LLBA (CSA)  
Psychology and Behavioral Sciences Collection (EBSCO)  
PubMed ([www.ncbi.nlm.nih.gov/pubmed/](http://www.ncbi.nlm.nih.gov/pubmed/))  
REHABDATA ([www.naric.com/research/rehab/](http://www.naric.com/research/rehab/))  
ScienceDirect  
speechBITE ([www.speechbite.com/](http://www.speechbite.com/))  
SUMSearch (<http://sumsearch.uthscsa.edu/>)  
TRIPDatabase ([www.tripdatabase.com/](http://www.tripdatabase.com/))

### Keywords:

Auditory neuropathy  
Auditory neuropathies  
Auditory neuropathy spectrum disorder  
Auditory dys-synchrony OR auditory dyssynchrony  
Auditory synaptopathy

Hearing aids OR cochlear implants OR auditory device OR frequency modulated device

Speech perception  
Language therapy  
Speech  
Hearing  
Educational status  
Achievement

Receptive  
Expressive  
Pragmatic\*  
Education\*  
Academic\*

Expanded Search Terms:

Limit: Humans, English, All Child (0-18)

"Hearing Aids"[Mesh] AND ("Hearing Loss, Mixed Conductive-Sensorineural"[Mesh] OR "Hearing Loss, Sensorineural"[Mesh] OR neuropath\* OR dyssynchron\* OR dys-synchron\* OR synaptopath\* OR "Auditory Diseases, Central"[Mesh]) AND ("Language Therapy"[Mesh] OR "Auditory Perception"[Mesh] OR "Educational Status"[Mesh] OR "Achievement"[Mesh] OR "Educational Measurement"[Mesh])

"Hearing Aids"[Mesh] AND ("Hearing Loss, Mixed Conductive-Sensorineural"[Mesh] OR "Hearing Loss, Sensorineural"[Mesh] OR neuropath\* OR dyssynchron\* OR dys-synchron\* OR synaptopath\* OR "Auditory Diseases, Central"[Mesh])

"Hearing Aids"[Mesh] AND (auditory neuropath\*)

"Hearing Aids"[Mesh] AND (auditory dyssynchron\* OR dys-synchron\* OR synaptopath\*)

"Hearing Aids"[Mesh] AND ("Hearing Loss, Mixed Conductive-Sensorineural"[Mesh] OR "Hearing Loss, Sensorineural"[Mesh] OR neuropath\* OR dyssynchron\* OR dys-synchron\* OR synaptopath\* OR "Auditory Diseases, Central"[Mesh]) AND ("Linguistics"[Mesh] OR "Social Behavior"[Mesh] OR "Verbal Behavior"[Mesh] OR "Speech Discrimination Tests"[Mesh] OR receptive OR expressive OR pragmatic\* OR education\* OR academic\*)

"Cochlear Implantation"[Mesh] AND ("Hearing Loss, Mixed Conductive-Sensorineural"[Mesh] OR "Hearing Loss, Sensorineural"[Mesh] OR neuropath\* OR dyssynchron\* OR dys-synchron\* OR synaptopath\* OR "Auditory Diseases, Central"[Mesh])

("Vestibulocochlear Nerve Diseases"[Mesh] OR "Vestibulocochlear Nerve"[Mesh] OR "Cochlear Nerve"[Mesh] OR "Peripheral Nervous System Diseases"[Mesh] OR "Cochlear Diseases"[Mesh]) AND ("Audiometry, Pure-Tone"[Mesh] OR "Audiometry, Evoked Response"[Mesh] OR "Evoked Potentials, Auditory, Brain Stem"[Mesh] OR "Otoacoustic Emissions, Spontaneous"[Mesh])

"auditory neuropathy"

("Cochlea"[Mesh] OR "Cochlear Implants"[Mesh] OR "Cochlear Nerve"[Mesh] OR "Cochlear Implantation"[Mesh] OR "Cochlear Microphonic Potentials"[Mesh] OR "Cochlear Diseases"[Mesh] OR "Hearing Aids"[Mesh] OR "Electrodes, Implanted"[Mesh] OR "Auditory

Brain Stem Implants"[Mesh] OR "Auditory Brain Stem Implantation"[Mesh] OR  
"Vestibulocochlear Nerve Diseases"[Mesh] OR "Auditory Perceptual Disorders"[Mesh] OR  
"Peripheral Nervous System Diseases"[Mesh] OR "Cranial Nerve Diseases"[Mesh]) AND (auditory  
AND (neuropath\* OR dys-synchron\* OR dyssynchron\* OR synaptopath\*))

(auditory AND (neuropath\* OR dys-synchron\* OR dyssynchron\* OR synaptopath\*))

((DE "HEARING DISORDERS" AND PT "ACADEMIC JOURNAL") OR (DE "HEARING  
DISORDERS --\*" AND PT "ACADEMIC JOURNAL")) AND (neuropathy OR neuropathies OR  
dys-synchron\* OR dyssynchron\* OR synaptopath\*)

((DE="evoked potentials auditory brain stem") and((DE="hearing aids") or(DE="cochlear  
implants"))) NOT DE="animals") and (DE="speech perception" or DE="treatment outcome")

(DE="auditory perception 05800" and DE="auditory stimulation 05950") and(DE="speech  
perception 82700")
